# Supplementary material for: Molecularly imprinted fluorescent chemosensor synthesized using quinoline-modified-β-cyclodextrin as monomer for spermidine recognition
Source: Royal Society of Chemistry journal article supplement (doi:10.1039/c5ra07761c), 2015-01-01
Supplement: c5ra07761c1.pdf [file c5ra07761c1.pdf]

## Supplementary information

### Molecularly imprinted fluorescent chemosensor synthesized using quinoline-modified- $\beta$ -cyclodextrin as monomer for spermidine recognition

Yang Cheng<sup>a,b</sup>, Ping Jiang<sup>a</sup> and Xiangchao Dong<sup>a,b,\*</sup>

<sup>a</sup> College of Chemistry, Nankai University, Tianjin 300071, China;

<sup>b</sup> Collaborative Innovation Center of Chemical Science and Engineering (Tianjin), Tianjin 300071, China;

\*Corresponding author: E-mail: xcdong@nankai.edu.cn

#### Characterization of $\beta$ -CDOTS and quinolyl- $\beta$ -CD with FT-IR analysis

FT-IR spectrum of  $\beta$ -CD (a),  $\beta$ -CDOTS (b) and quinolyl- $\beta$ -CD (c) are shown in Fig. S1. In the infrared spectrum of  $\beta$ -CDOTS (b), characteristic bands of 1599  $\text{cm}^{-1}$  ( $\nu_{\text{C}=\text{C}}$ , benzene ring), 1364  $\text{cm}^{-1}$  ( $\nu_{\text{as S}=\text{O}}$ ), 1177  $\text{cm}^{-1}$  ( $\nu_{\text{s S}=\text{O}}$ ), 1078  $\text{cm}^{-1}$  ( $\nu_{\text{C-O-C}}$ ), 1028  $\text{cm}^{-1}$  ( $\nu_{\text{C-O}}$ ), 837  $\text{cm}^{-1}$  ( $\delta_{\text{C-H}}$ , benzene ring) and 815  $\text{cm}^{-1}$  ( $\delta_{\text{C-H}}$ , benzene ring) appeared. The results have shown that the tosyl ester was successfully grafted on  $\beta$ -CD.

In the FT-IR spectrum (Fig. S1) of quinolyl- $\beta$ -CD (c), the peaks of  $\beta$ -CDOTS (b) at 1364  $\text{cm}^{-1}$  ( $\nu_{\text{as S}=\text{O}}$ ) and 1177  $\text{cm}^{-1}$  ( $\nu_{\text{s S}=\text{O}}$ ) disappeared. The peaks of  $\nu_{\text{C}=\text{C}}$  of aromatic ring at 1602  $\text{cm}^{-1}$ , 1578  $\text{cm}^{-1}$ , 1503  $\text{cm}^{-1}$  and 1452  $\text{cm}^{-1}$  appeared. The 824  $\text{cm}^{-1}$  ( $\delta_{\text{C-H}}$ , aromatic ring) and 788  $\text{cm}^{-1}$  ( $\delta_{\text{C-H}}$ , aromatic ring) also displayed. The results indicated that p-toluene sulfonyl group was substituted and the quinoline groups were grafted on  $\beta$ -CD.

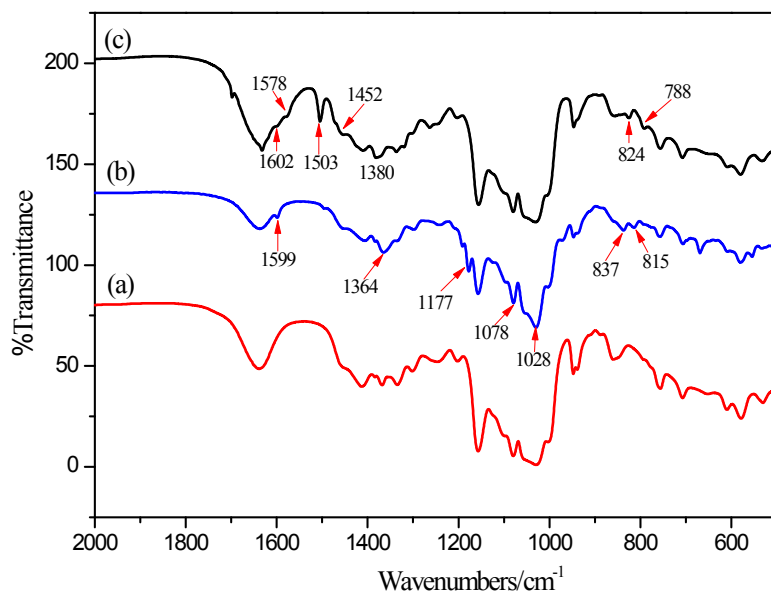

**Fig. S1.** FT-IR spectra of β-CD (a), β-CDOTS (b) and quinoly1-β-CD (c).

**The figures S2, S3 and S4**

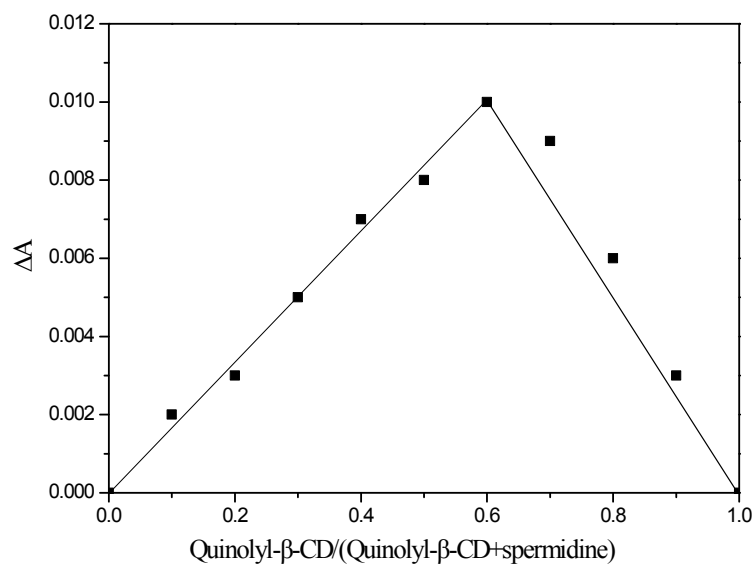

**Fig. S2.** Job's plot of quinoly1-β-CD/spermidine system ( $\lambda_{\text{em}} = 300 \text{ nm}$ ). (Total concentration of quinoly1-β-CD and spermidine was  $5.0 \times 10^{-5} \text{ mol} \cdot \text{L}^{-1}$ ).

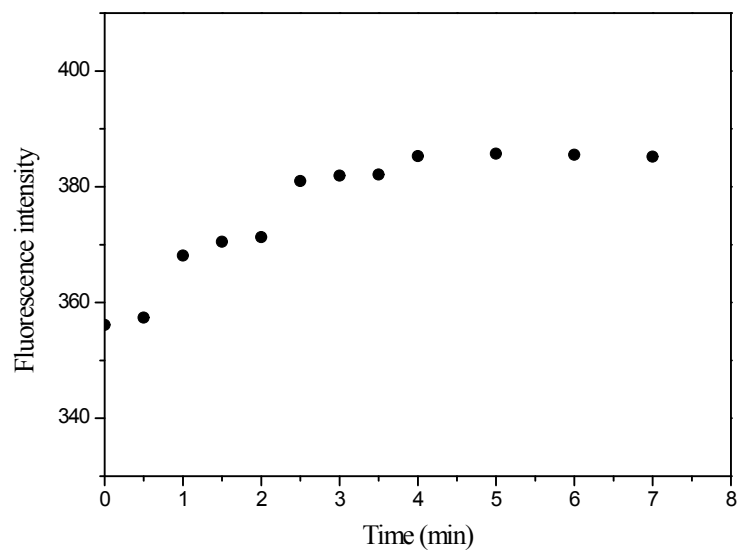

**Fig. S3.** The response of the imprinted chemosensor for spermidine solution ( $1.0 \times 10^{-4}$  mol·L<sup>-1</sup>) versus sample soaking time.

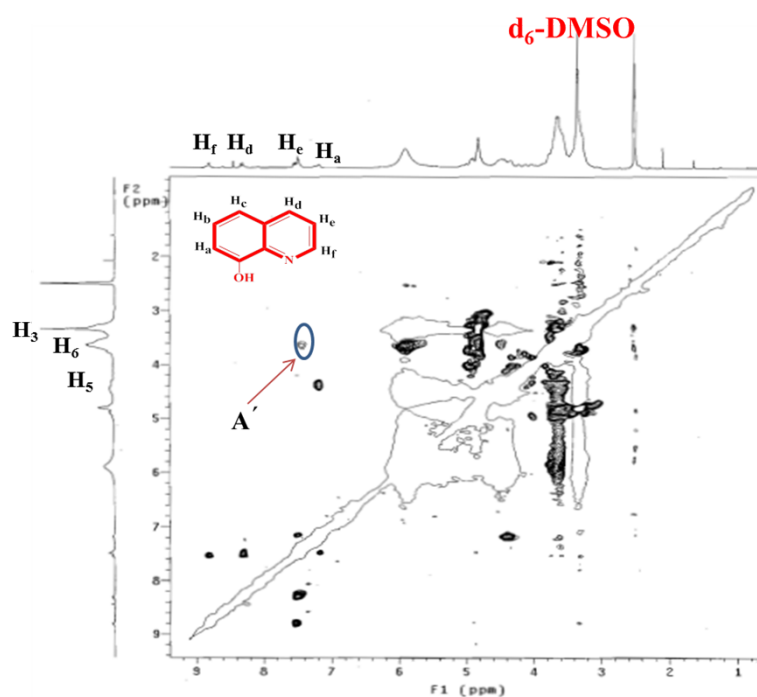

**Fig. S4.** 2D <sup>1</sup>H NMR ROESY spectrum of quinolyl-β-CD.
